# Supplementary material for: The temperature range and optical properties of the liquid crystalline blue phase in inverse opal structures
Source: Royal Society of Chemistry journal article supplement (doi:10.1039/c8tc02712a), 2018-01-01
Supplement: c8tc02712a1.pdf [file c8tc02712a1.pdf]

## Supporting Information

### The temperature range and optical properties of Liquid crystalline blue phase in inverse opal structures

Yuxian Zhang,<sup>a,b</sup> Weidong Zhao,<sup>a,b</sup> Yongbo Yu,<sup>a,b</sup> Zhou Yang,<sup>\*a,b</sup> Wanli He,<sup>\*a,b</sup> Hui Cao,<sup>a,b</sup> Dong Wang<sup>a,b</sup>

- State Key Laboratory for Advanced Metals and Materials, School of Materials Science and Engineering, University of Science and Technology Beijing, Beijing 100083, China.
- Department of Materials Science and Engineering, University of Science and Technology Beijing, Beijing, 100083, China

\*Corresponding authors:

E-mail Address: yangz@ustb.edu.cn (Z. Yang), hewanli@mater.ustb.edu.cn (W. He)

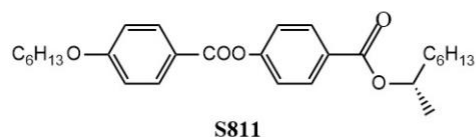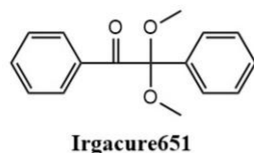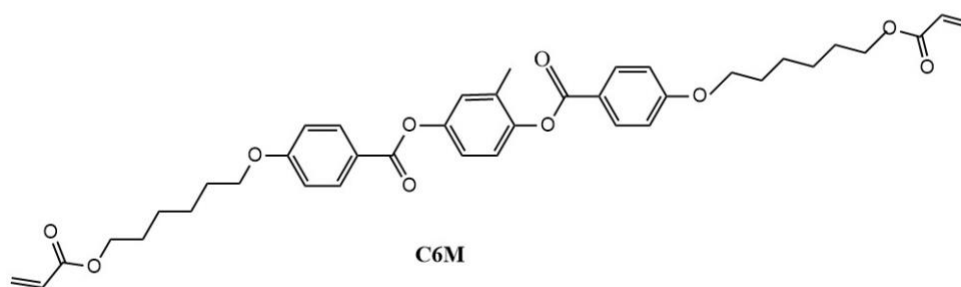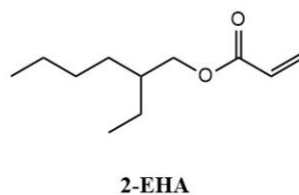

**Fig. S1** Chemical structures of the chiral dopant S811, the photoinitiator Irgacure651, the monomer C6M and 2-ethylhexyl acrylate (2-EHA).

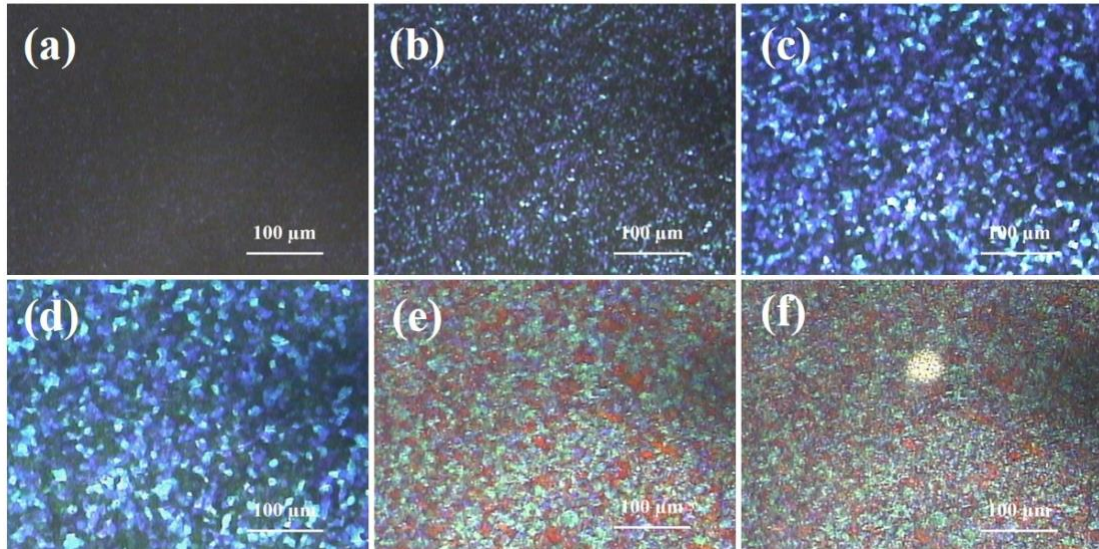

**Fig S2.** POM images of the BP-IOP device with 20  $\mu\text{m}$ -spacer taken at a cooling rate of 1.0  $^{\circ}\text{C}/\text{min}$  (a) 35.5  $^{\circ}\text{C}$  (b) 34.9  $^{\circ}\text{C}$  (c) 34.2  $^{\circ}\text{C}$  (d) 33.9  $^{\circ}\text{C}$  (e) 29.7  $^{\circ}\text{C}$  (f) 24.5  $^{\circ}\text{C}$

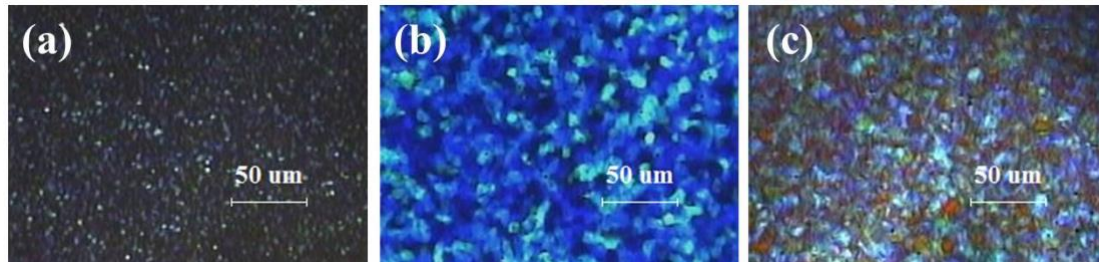

**Fig S3.** POM textures of PSBP sample at different temperatures before polymerization (a) 21.2  $^{\circ}\text{C}$  (b) 18  $^{\circ}\text{C}$  (c) 17.6  $^{\circ}\text{C}$

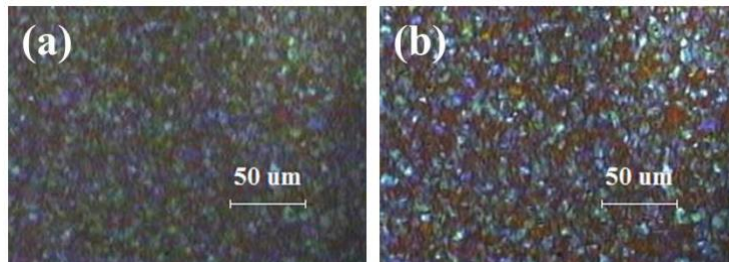

**Fig S4.** POM textures of PSBP sample at different temperatures after polymerization (a) 25  $^{\circ}\text{C}$  (b) 21.4  $^{\circ}\text{C}$
